# Supplementary material for: A Potential Adhesin/Invasin STM0306 Participates in Host Cell Inflammation Induced by Salmonella enterica Serovar Typhimurium
Source: MDPI journal article supplement (doi:10.3390/ijms24098170), 2023-05-03
Supplement: s1 [file s1]

**Table S1.** Primer sequences for molecular clone.

| Primers       | Primer sequences (5'→3')                                                                             |
|---------------|------------------------------------------------------------------------------------------------------|
| 0306-Kan-F    | TCTGAAATGAAAAACTTTTTTCGCAGTCTGCATCATTCCCCTTGTG<br>GTAGCCTGGTCCGCTACTGCATCAGGCGATTGTGTAGGCTGGAG       |
| 0306-Kan-R    | TTAAAAGGCGTAAGTAATGCCGAGCATGAAGTCATTGGAGGCAG<br>CCTTTGTGTCTGCATCATAAGCGGTATAACGGCTGACATGGGAAT<br>TAG |
| 0306-Y-F      | GGCAGGTTCTGAAATGAAAAAC                                                                               |
| 0306-Y-R      | CCGATAGTGTTTAAAAGGCGTAAG                                                                             |
| 0306-Hind III | CAGCTTATCATCGATAAGCTTTCTGAAATGAAAAACTTTTTTCGCA<br>GTCTGC                                             |
| 0306-EcoR V   | GCTGTCGGAATGGACGATATCTTAAAAGGCGTAAGTAATGCCGA<br>GC                                                   |
| 0306-XhoI     | TGGTGGTGGTGGTGGTGGTCTCGAGTCTGAAATGAAAAACTTTTTTCG<br>CAGTCTGC                                         |
| 0306-BamH I   | CAAGGCCATGGCTGATATCGGATCCTTAAAAGGCGTAAGTAATG<br>CCGAGC                                               |

**Table S2.** Primer sequences for qRT-PCR.

| Species        | Primers          | Primer sequences (5'→3')   |
|----------------|------------------|----------------------------|
| S. Typhimurium | 0306-F           | CCCTTGTGGTAGCCTGGTC        |
|                | 0306-R           | GCCTTTAGCATCCGTCTCA        |
|                | gyrA-F           | CGGGATACAGTAGAGGGATAGCGG   |
|                | gyrA-R           | CACCAACGACACGGGCAGATT      |
|                | csgA-F           | ATGCCCCGTAAATCTGAAACG      |
|                | csgA-R           | CCGTATTGGCCGACAGTAAT       |
|                | csgD-F           | TATGATGGAAGCGGATAAGAA      |
|                | csgD-R           | GCACCCAGGCAGTTTCAT         |
|                | hilA-F           | AAATATCCACGCAGGAAATAAC     |
|                | hilA-R           | GGGCAACCAGCACTAACG         |
|                | hilC-F           | ACCAAGCCCAGGCACT           |
|                | hilC-R           | TGTGGTTATGATACGCCTTC       |
|                | hilC-F           | TGTAAGTAATAGTCATCAGCGTCCTG |
|                | hilC-R           | CTCCGAAAGCAAATAAAGTGAAA    |
|                | sopB-F           | AGCGGGCGAGGCGGTAAG         |
|                | sopB-R           | CCGGCTGGGTCAACGATTGC       |
|                | sopD-F           | TAATGAAAGTCGGCTTGCTC       |
|                | sopD-R           | TGCCCCGTGAATGATGGAG        |
|                | sopE-F           | ACTAACATAAACTATCCACCCAGCAC |
|                | sopE-R           | ACCGCCCTACCCTCAGAAGC       |
|                | sopE2-F          | ACTAACATAAACTATCCACCCAGCAC |
|                | sopE2-R          | GCTTCTGAGGGTAGGGCGGT       |
|                | mipA-F           | GTGGAATGACAATGCCGATAAGT    |
|                | mipA-R           | GCCAGTGAGGTACGCAGGAA       |
| Pig            | TNF- $\alpha$ -F | GCATCGCCGTCTCCTACCA        |
|                | TNF- $\alpha$ -R | CCTGCCCAGATTCAGCAAAGT      |
|                | IL-1 $\beta$ -F  | GAGCTGAAGGCTCTCCACCTC      |
|                | IL-1 $\beta$ -R  | ATCGCTGTCATCTCCTTGAC       |
|                | CXCL2-F          | CGCTGCTGCTCCTGCTT          |
|                | CXCL2-R          | GAGTGGCTATGACTTCCGTTT      |
|                | Occludin-F       | ATCAACAAAGGCAACTCT         |
|                | Occludin-R       | GCAGCAGCCATGTACTCT         |
|                | GAPDH-F          | GTGAAGGTCGGAGTGAACGGATT    |
|                | GAPDH-R          | CCCATTGATGTTGGCGGGAT       |
